# Supplementary material for: Open-label randomised pragmatic trial (CONTACT) comparing naproxen and low-dose colchicine for the treatment of gout flares in primary care
Source: PubMed Central journal article supplement (PMC7025732; doi:10.1136/annrheumdis-2019-216154), 2019-10-30
Supplement: annrheumdis-2019-216154supp001.pdf [file annrheumdis-2019-216154supp001.pdf]

**Supplementary Table 1: recruitment by region and GP practice**

|                                                           | Naproxen   | Colchicine  |
|-----------------------------------------------------------|------------|-------------|
| <b>Recruitment by region, n (%)</b>                       |            |             |
| Keele                                                     | 55 (27.5%) | 52 (26.1%)  |
| Southampton                                               | 88 (44.0%) | 101 (50.8%) |
| Oxford                                                    | 41 (20.5%) | 31 (15.6%)  |
| Nottingham                                                | 16 (8.0%)  | 15 (7.5%)   |
| <b>Participants recruited per practice, median (IQR)*</b> | 2 (1-4)    | 2 (1-3)     |

\*75/100 GP practices who agreed to take part recruited at least one participant. Numbers recruited per practice ranged from 1 (21 practices) to 41 for the best recruiting practice (skewed upwards); overall median of 3 (IQR 1-7). IQR, interquartile range

**Supplementary table 2: per protocol analyses**

|                    | <b>1</b>                        |                | <b>2</b>                        |                | <b>3</b>                        |                |
|--------------------|---------------------------------|----------------|---------------------------------|----------------|---------------------------------|----------------|
|                    | <b>Mean difference (95% CI)</b> | <b>P value</b> | <b>Mean difference (95% CI)</b> | <b>P value</b> | <b>Mean difference (95% CI)</b> | <b>P value</b> |
| Day 1              | 0.01<br>(-0.45 to 0.46)         | 0.97           | -0.04<br>(-0.50 to 0.41)        | 0.85           | -0.04<br>(-0.54 to 0.46)        | 0.88           |
| Day 2              | -0.43<br>(-0.88 to 0.02)        | 0.063          | -0.47<br>(-0.92 to -0.02)       | 0.040          | -0.57<br>(-1.07 to -0.07)       | 0.024          |
| Day 3              | -0.11<br>(-0.56 to 0.33)        | 0.62           | -0.17<br>(-0.62 to 0.28)        | 0.47           | -0.20<br>(-0.69 to 0.30)        | 0.44           |
| Day 4              | -0.11<br>(-0.56 to 0.34)        | 0.62           | -0.19<br>(-0.64 to 0.26)        | 0.41           | -0.23<br>(-0.72 to 0.27)        | 0.37           |
| Day 5              | -0.16<br>(-0.61 to 0.28)        | 0.47           | -0.25<br>(-0.71 to 0.20)        | 0.27           | -0.23<br>(-0.73 to 0.27)        | 0.36           |
| Day 6              | -0.18<br>(-0.63 to 0.26)        | 0.42           | -0.31<br>(-0.77 to 0.14)        | 0.17           | -0.22<br>(-0.72 to 0.27)        | 0.38           |
| Day 7 <sup>#</sup> | -0.28<br>(-0.72 to 0.16)        | 0.22           | -0.43<br>(-0.88 to 0.02)        | 0.061          | -0.41<br>(-0.91 to 0.08)        | 0.10           |
| Overall (Days 1-7) | -0.18<br>(-0.54 to 0.17)        | 0.32           | -0.27<br>(-0.62 to 0.09)        | 0.14           | -0.27<br>(-0.67 to 0.13)        | 0.18           |
| Week 4             | -0.24<br>(-0.68 to 0.20)        | 0.29           | -0.48<br>(-0.94 to -0.03)       | 0.038          | -0.57<br>(-1.07 to -0.07)       | 0.025          |

Definition of per-protocol analyses:-

1 = No treatment violation by medical record note reporting (no treatment crossover + no early cessation of treatment) {n (A/B) = 184/182; 1014 / 1054 repeat data across days 1-7}

2 = At least 1-day use of randomised treatment by self-report (in addition to 1 above) {n (A/B) = 149/155; 998 / 1032 repeat data across days 1-7}

3 = 7 days (4-7 days) use of randomised treatment naproxen (colchicine) by self-report (in addition to 1 above) {n (A/B) = 118/134; 807 / 890 repeat data across days 1-7}

# Summary is inclusive of minimum data collection (for scores at day 7)

**Supplementary table 3: Comparison of complete pain resolution over days 1-7 and at 4 weeks**

|        | Naproxen        | Colchicine      | $\chi^2$ | P value |
|--------|-----------------|-----------------|----------|---------|
| Day 1  | 2/160 (1.3%)    | 8/164 (4.9%)    | 3.6      | 0.10*   |
| Day 2  | 11/161 (6.8%)   | 12/164 (7.3%)   | 0.03     | 0.87    |
| Day 3  | 29/163 (17.8%)  | 29/166 (17.5%)  | 0.01     | 0.94    |
| Day 4  | 56/158 (35.4%)  | 55/168 (32.7%)  | 0.27     | 0.61    |
| Day 5  | 79/156 (50.6%)  | 72/159 (45.3%)  | 0.91     | 0.34    |
| Day 6  | 95/157 (60.5%)  | 89/160 (55.6%)  | 0.78     | 0.38    |
| Day 7  | 115/171 (67.3%) | 116/173 (67.1%) | <0.01    | 0.97    |
| Week 4 | 130/173 (75.1%) | 130/177 (73.4%) | 0.13     | 0.72    |

\* Complete-case responders to all pain questions (diary days 1 through 7 and at 4 weeks).

Median = Day 5 for Naproxen; Median = Day 6 for Colchicine.

Interquartile range: Day 4, Week 4 [in both treatment groups].

P value by Mann-Whitney U test = 0.73.

Supplementary Table 4: Self-reported daily side-effects within the first week of follow-up – complete-case data

|                                 | Day1          |               | Day2          |               | Day3          |               | Day4          |               | Day5          |               | Day6          |               | Day7          |               |
|---------------------------------|---------------|---------------|---------------|---------------|---------------|---------------|---------------|---------------|---------------|---------------|---------------|---------------|---------------|---------------|
|                                 | N             | C             | N             | C             | N             | C             | N             | C             | N             | C             | N             | C             | N             | C             |
|                                 | (n=160)       | (n=164)       | (n=161)       | (n=164)       | (n=163)       | (n=166)       | (n=160)       | (n=168)       | (n=160)       | (n=162)       | (n=158)       | (n=162)       | (n=172)*      | (n=176)*      |
|                                 | NP            | CC            | NP            | CC            | NP            | CC            | NP            | CC            | NP            | CC            | NP            | CC            | NP            | CC            |
| Nausea                          | 17<br>(10.6%) | 15<br>(9.1%)  | 11<br>(6.8%)  | 16<br>(9.8%)  | 7<br>(4.3%)   | 17<br>(10.2%) | 6<br>(3.8%)   | 11<br>(6.5%)  | 6<br>(3.8%)   | 6<br>(3.7%)   | 2<br>(1.3%)   | 6<br>(3.7%)   | 3<br>(1.7%)   | 5<br>(2.8%)   |
| Vomiting                        | 3<br>(1.9%)   | 1<br>(0.6%)   | 2<br>(1.2%)   | 1<br>(0.6%)   | 1<br>(0.6%)   | 1<br>(0.6%)   | 0<br>(0.0%)   | 0<br>(0.0%)   | 0<br>(0.0%)   | 0<br>(0.0%)   | 0<br>(0.0%)   | 1<br>(0.6%)   | 0<br>(0.0%)   | 0<br>(0.0%)   |
| Nausea and/or vomiting          | 19<br>(11.9%) | 16<br>(9.8%)  | 12<br>(7.5%)  | 17<br>(10.4%) | 7<br>(4.3%)   | 18<br>(10.8%) | 6<br>(3.8%)   | 11<br>(6.5%)  | 6<br>(3.8%)   | 6<br>(3.7%)   | 2<br>(1.3%)   | 7<br>(4.3%)   | 3<br>(1.7%)   | 5<br>(2.8%)   |
| Dyspepsia                       | 10<br>(6.3%)  | 13<br>(7.9%)  | 11<br>(6.8%)  | 11<br>(6.7%)  | 11<br>(6.7%)  | 14<br>(8.4%)  | 9<br>(5.6%)   | 11<br>(6.5%)  | 5<br>(3.1%)   | 7<br>(4.3%)   | 6<br>(3.8%)   | 6<br>(3.7%)   | 4<br>(2.3%)   | 6<br>(3.4%)   |
| Abdominal pain                  | 5<br>(3.1%)   | 7<br>(4.3%)   | 6<br>(3.7%)   | 8<br>(4.9%)   | 7<br>(4.3%)   | 8<br>(4.8%)   | 7<br>(4.4%)   | 8<br>(4.8%)   | 3<br>(1.9%)   | 9<br>(5.6%)   | 2<br>(1.3%)   | 6<br>(3.7%)   | 4<br>(2.3%)   | 6<br>(3.4%)   |
| Headache                        | 9<br>(5.6%)   | 16<br>(9.8%)  | 10<br>(6.2%)  | 12<br>(7.3%)  | 3<br>(1.8%)   | 13<br>(7.8%)  | 3<br>(1.9%)   | 13<br>(7.7%)  | 5<br>(3.1%)   | 10<br>(6.2%)  | 4<br>(2.5%)   | 5<br>(3.1%)   | 3<br>(1.7%)   | 4<br>(2.3%)   |
| Constipation                    | 8<br>(5.0%)   | 1<br>(0.6%)   | 15<br>(9.3%)  | 2<br>(1.2%)   | 16<br>(9.8%)  | 5<br>(3.0%)   | 8<br>(5.0%)   | 4<br>(2.4%)   | 6<br>(3.8%)   | 3<br>(1.9%)   | 6<br>(3.8%)   | 2<br>(1.2%)   | 5<br>(2.9%)   | 3<br>(1.7%)   |
| Diarrhoea                       | 7<br>(4.4%)   | 20<br>(12.2%) | 7<br>(4.3%)   | 28<br>(17.1%) | 12<br>(7.4%)  | 40<br>(24.1%) | 10<br>(6.3%)  | 52<br>(31.0%) | 3<br>(1.9%)   | 34<br>(21.0%) | 7<br>(4.4%)   | 18<br>(11.1%) | 5<br>(2.9%)   | 13<br>(7.4%)  |
| Skin rash                       | 2<br>(1.3%)   | 3<br>(1.8%)   | 2<br>(1.2%)   | 2<br>(1.2%)   | 0<br>(0.0%)   | 1<br>(0.6%)   | 0<br>(0.0%)   | 1<br>(0.6%)   | 1<br>(0.6%)   | 1<br>(0.6%)   | 0<br>(0.0%)   | 1<br>(0.6%)   | 0<br>(0.0%)   | 2<br>(1.1%)   |
| Any side effect(s) <sup>#</sup> | 54<br>(33.8%) | 54<br>(32.9%) | 50<br>(31.1%) | 64<br>(39.0%) | 52<br>(31.9%) | 76<br>(45.8%) | 45<br>(28.1%) | 78<br>(46.4%) | 38<br>(23.8%) | 52<br>(32.1%) | 35<br>(22.2%) | 36<br>(22.2%) | 26<br>(15.1%) | 32<br>(18.2%) |

N = Naproxen; C = Colchicine

\* These are higher denominator numbers since questions on side-effects on day 7 were included in minimal data collection retrieval.

<sup>#</sup> Includes the side-effects listed and 'other' (nominated free-text) side-effects.

**Supplementary table 5: Mean (SD) resource use, costs and outcomes per participant over 4 weeks follow-up**

|                              | <b>Naproxen (n=200)</b> | <b>Colchicine (n=199)</b> | <b>Difference (CI)</b>   |
|------------------------------|-------------------------|---------------------------|--------------------------|
| <b>RESOURCE USE</b>          |                         |                           |                          |
| GP visits                    | 0.19 (0.34)             | 0.27 (0.40)               | -0.08 (-0.15 to 0.0002)  |
| Nurse visits                 | 0.05 (0.19)             | 0.07 (0.22)               | -0.02 (-0.06 to 0.03)    |
| Emergency GP visits          | 0.05 (0.17)             | 0.04 (0.18)               | 0.01 (-0.03 to 0.04)     |
| A and E visits               | 0.006 (0.07)            | 0.007 (0.07)              | -0.001 (-0.02 to 0.01)   |
| <b>COSTS (£)</b>             |                         |                           |                          |
| Drug costs                   | 0.83 (2.00)             | 1.20 (2.22)               | -0.37 (-0.78 to 0.02)    |
| GP costs                     | 6.44 (11.16)            | 8.80 (13.16)              | -2.36 (-4.74 to 0.12)    |
| Nurse costs                  | 0.66 (2.26)             | 0.86 (2.71)               | -0.20 (-0.68 to 0.31)    |
| Emergency GP costs           | 2.45 (8.54)             | 2.14 (8.68)               | 0.31 (-1.28 to 2.04)     |
| A and E costs                | 0.41 (5.10)             | 0.48 (5.15)               | -0.07 (-1.21 to 0.95)    |
| Intervention cost            | 6.77 (4.56)             | 9.83 (6.32)               | -3.06 (-4.17 to -2.08)   |
| Total cost                   | 17.57 (20.38)           | 23.31 (23.46)             | -5.74 (-10.03 to -1.64)  |
| <b>HEALTH OUTCOMES</b>       |                         |                           |                          |
| Baseline EQ-5D               | 0.665 (0.21)            | 0.663 (0.22)              | 0.002 (-0.04 to 0.04)    |
| Day 7 EQ-5D                  | 0.882 (0.13)            | 0.873 (0.14)              | 0.009 (-0.02 to 0.03)    |
| Week 4 EQ-5D                 | 0.900 (0.11)            | 0.894 (0.15)              | 0.006 (-0.02 to 0.03)    |
| QALYs                        | 0.0663 (0.008)          | 0.0657 (0.01)             | 0.0006 (-0.001 to 0.002) |
| Adjusted QALYs <sup>+</sup>  | 0.0662                  | 0.0658                    | 0.0004                   |
| <b>WORK-RELATED OUTCOMES</b> |                         |                           |                          |
| Time off work (days)         | 0.40 (2.47)             | 0.35 (2.51)               | 0.05 (-0.42 to 0.53)     |
| Productivity cost (£)        | 32.16 (190.40)          | 28.44(207.42)             | 3.72 (-34.27 to 40.73)   |

<sup>+</sup>Adjusted for baseline EQ-5D
